# Supplementary material for: The adhesion GPCR GPR116/ADGRF5 has a dual function in pancreatic islets regulating somatostatin release and islet development
Source: PubMed Central journal article supplement (PMC10791652; doi:10.1038/s42003-024-05783-9), 2024-01-16
Supplement: 42003_2024_5783_MOESM2_ESM.pdf [file 42003_2024_5783_MOESM2_ESM.pdf]

## Reporting Summary

Nature Portfolio wishes to improve the reproducibility of the work that we publish. This form provides structure for consistency and transparency in reporting. For further information on Nature Portfolio policies, see our [Editorial Policies](#) and the [Editorial Policy Checklist](#).

### Statistics

For all statistical analyses, confirm that the following items are present in the figure legend, table legend, main text, or Methods section.

- |                                     |                                                                                                                                                                                                                                                                                                |
|-------------------------------------|------------------------------------------------------------------------------------------------------------------------------------------------------------------------------------------------------------------------------------------------------------------------------------------------|
| n/a                                 | Confirmed                                                                                                                                                                                                                                                                                      |
| <input type="checkbox"/>            | <input checked="" type="checkbox"/> The exact sample size ( $n$ ) for each experimental group/condition, given as a discrete number and unit of measurement                                                                                                                                    |
| <input type="checkbox"/>            | <input checked="" type="checkbox"/> A statement on whether measurements were taken from distinct samples or whether the same sample was measured repeatedly                                                                                                                                    |
| <input type="checkbox"/>            | <input checked="" type="checkbox"/> The statistical test(s) used AND whether they are one- or two-sided<br><i>Only common tests should be described solely by name; describe more complex techniques in the Methods section.</i>                                                               |
| <input type="checkbox"/>            | <input checked="" type="checkbox"/> A description of all covariates tested                                                                                                                                                                                                                     |
| <input type="checkbox"/>            | <input checked="" type="checkbox"/> A description of any assumptions or corrections, such as tests of normality and adjustment for multiple comparisons                                                                                                                                        |
| <input type="checkbox"/>            | <input checked="" type="checkbox"/> A full description of the statistical parameters including central tendency (e.g. means) or other basic estimates (e.g. regression coefficient) AND variation (e.g. standard deviation) or associated estimates of uncertainty (e.g. confidence intervals) |
| <input type="checkbox"/>            | <input checked="" type="checkbox"/> For null hypothesis testing, the test statistic (e.g. $F$ , $t$ , $r$ ) with confidence intervals, effect sizes, degrees of freedom and $P$ value noted<br><i>Give <math>P</math> values as exact values whenever suitable.</i>                            |
| <input checked="" type="checkbox"/> | <input type="checkbox"/> For Bayesian analysis, information on the choice of priors and Markov chain Monte Carlo settings                                                                                                                                                                      |
| <input checked="" type="checkbox"/> | <input type="checkbox"/> For hierarchical and complex designs, identification of the appropriate level for tests and full reporting of outcomes                                                                                                                                                |
| <input checked="" type="checkbox"/> | <input type="checkbox"/> Estimates of effect sizes (e.g. Cohen's $d$ , Pearson's $r$ ), indicating how they were calculated                                                                                                                                                                    |

*Our web collection on [statistics for biologists](#) contains articles on many of the points above.*

### Software and code

Policy information about [availability of computer code](#)

Data collection

Data analysis

For manuscripts utilizing custom algorithms or software that are central to the research but not yet described in published literature, software must be made available to editors and reviewers. We strongly encourage code deposition in a community repository (e.g. GitHub). See the Nature Portfolio [guidelines for submitting code & software](#) for further information.

### Data

Policy information about [availability of data](#)

All manuscripts must include a [data availability statement](#). This statement should provide the following information, where applicable:

- Accession codes, unique identifiers, or web links for publicly available datasets
- A description of any restrictions on data availability
- For clinical datasets or third party data, please ensure that the statement adheres to our [policy](#)

## Research involving human participants, their data, or biological material

Policy information about studies with [human participants or human data](#). See also policy information about [sex, gender \(identity/presentation\), and sexual orientation](#) and [race, ethnicity and racism](#).

|                                                                    |                                                                           |
|--------------------------------------------------------------------|---------------------------------------------------------------------------|
| Reporting on sex and gender                                        | <input type="text" value="We do not report data on human participants."/> |
| Reporting on race, ethnicity, or other socially relevant groupings | <input type="text" value="We do not report data on human participants."/> |
| Population characteristics                                         | <input type="text" value="We do not report data on human participants."/> |
| Recruitment                                                        | <input type="text" value="We do not report data on human participants."/> |
| Ethics oversight                                                   | <input type="text" value="We do not report data on human participants."/> |

Note that full information on the approval of the study protocol must also be provided in the manuscript.

## Field-specific reporting

Please select the one below that is the best fit for your research. If you are not sure, read the appropriate sections before making your selection.

Life sciences       Behavioural & social sciences       Ecological, evolutionary & environmental sciences

For a reference copy of the document with all sections, see [nature.com/documents/nr-reporting-summary-flat.pdf](https://www.nature.com/documents/nr-reporting-summary-flat.pdf)

## Life sciences study design

All studies must disclose on these points even when the disclosure is negative.

|                 |                                                                                                                                                                                                                                                                                     |
|-----------------|-------------------------------------------------------------------------------------------------------------------------------------------------------------------------------------------------------------------------------------------------------------------------------------|
| Sample size     | <input type="text" value="Sample size calculation was performed upon application for permission from the Animal Care and Use Committee as this is requested for the permission. Thereto, G power 3 was used and sample size calculated comparing independent means (two groups)."/> |
| Data exclusions | <input type="text" value="We did not exclude data."/>                                                                                                                                                                                                                               |
| Replication     | <input type="text" value="We give the number of independent performed experiments in the figure legends. All experiments were replicated."/>                                                                                                                                        |
| Randomization   | <input type="text" value="Randomization was not performed. Animals were assigned to the group according to their genotype. In cell culture experiments, cells / islets were distributed from a cell suspension to the individual wells."/>                                          |
| Blinding        | <input type="text" value="Blinding was not performed. In cell culture experiments, cells were seeded from a cell suspension and treated with the indicated substances."/>                                                                                                           |

## Reporting for specific materials, systems and methods

We require information from authors about some types of materials, experimental systems and methods used in many studies. Here, indicate whether each material, system or method listed is relevant to your study. If you are not sure if a list item applies to your research, read the appropriate section before selecting a response.

### Materials & experimental systems

| n/a                                 | Involved in the study                                           |
|-------------------------------------|-----------------------------------------------------------------|
| <input type="checkbox"/>            | <input checked="" type="checkbox"/> Antibodies                  |
| <input type="checkbox"/>            | <input checked="" type="checkbox"/> Eukaryotic cell lines       |
| <input checked="" type="checkbox"/> | <input type="checkbox"/> Palaeontology and archaeology          |
| <input type="checkbox"/>            | <input checked="" type="checkbox"/> Animals and other organisms |
| <input checked="" type="checkbox"/> | <input type="checkbox"/> Clinical data                          |
| <input checked="" type="checkbox"/> | <input type="checkbox"/> Dual use research of concern           |
| <input checked="" type="checkbox"/> | <input type="checkbox"/> Plants                                 |

### Methods

| n/a                                 | Involved in the study                           |
|-------------------------------------|-------------------------------------------------|
| <input checked="" type="checkbox"/> | <input type="checkbox"/> ChIP-seq               |
| <input checked="" type="checkbox"/> | <input type="checkbox"/> Flow cytometry         |
| <input checked="" type="checkbox"/> | <input type="checkbox"/> MRI-based neuroimaging |

## Antibodies

|                 |                                                                                                                                                                                                                                                                                     |
|-----------------|-------------------------------------------------------------------------------------------------------------------------------------------------------------------------------------------------------------------------------------------------------------------------------------|
| Antibodies used | <input type="text" value="anti-insulin-AB (3014S, CST); anti-glucagon-AB (2760S, CST); Alexa-488-con. goat anti-rabbit-AB (A11034, Invitrogen); anti-somatostatin-AB (ab30788, Abcam); Alexa-568-con. goat anti-rat-AB (A11077, Invitrogen); anti-HA-POD-AB (12013819001, Roche)"/> |
|-----------------|-------------------------------------------------------------------------------------------------------------------------------------------------------------------------------------------------------------------------------------------------------------------------------------|

Validation

Antibodies were validated by the vendor. For cell culture, mock-transfected cells were used as negative control.

## Eukaryotic cell lines

Policy information about [cell lines and Sex and Gender in Research](#)

Cell line source(s)

HEK293T (ATCC); COS-7 (ATCC); aTC-1 (ATCC); MIN6 (Dr. J. Wess, NIH, NIDDK); INS1 (Sigma-Aldrich), QGP-1 (Dr. K. Hill, Leipzig University), pancreatic mouse islets (primary isolated, male and female)

Authentication

Cell lines were not authenticated.

Mycoplasma contamination

Cell lines were negative for mycoplasma and were tested on a monthly basis using MycoAlert® PLUS (Lonza, LT07-710)

Commonly misidentified lines  
(See [ICLAC](#) register)

none

## Animals and other research organisms

Policy information about [studies involving animals](#); [ARRIVE guidelines](#) recommended for reporting animal research, and [Sex and Gender in Research](#)

Laboratory animals

Mouse strains: MIP-GFP (B6.Cg-Tg(Ins1-EGFP)1Hara/J); Sst116 (C-GPR116TM2Npa-floxed x B6N.Cg-Ssttm2.1(cre)Zjh/J); Gpr116ko (C-GPR116TM2Npa); Age: 14 to 16 weeks

Wild animals

None were used.

Reporting on sex

Metabolic characterization was performed for male mice. Body weight was measured for both sexes. Islet isolation was performed for both sexes.

Field-collected samples

None were used.

Ethics oversight

The necessary permissions for animal experiments were issued by Animal Care and Use Committee (ACUC# T24/16; T19/18; TVV02/15; TVV43/18) and the Government of the State of Saxony (Germany).

Note that full information on the approval of the study protocol must also be provided in the manuscript.

## Plants

Seed stocks

none were used

Novel plant genotypes

none were used

Authentication

none were used
